# Supplementary material
Source: publisher site journal article supplement (https://www.dovepress.com/get_supplementary_file.php?f=361955.xlsx)
Supplement: Supplementary file 1 [file get_supplementary_file.php]

## Sheet: Table S1
Supplementary Table S1 Potential targets of ECH
ABO
AKR1C3
ALDH2
AMY2B
AR
CBR1
CYP2B6
GLT6D1
GLTP
LGALS3
TYR
ABO
ACADM
ACAT1
ACP3
ADAM17
ADH1B
ADH1C
ADH5
ADK
AGXT
AHCY
AKR1B1
AKR1C3
AKT1
ALB
ALDH2
ALDOA
AMD1
AMY1A
AMY1B
AMY1C
AMY2A
ANG
ANXA5
APCS
APRT
AR
ARF1
ARF4
ARG1
ARG2
ARHGAP1
ARSA
ATIC
ATOX1
AZGP1
B3GAT1
BACE1
BAG1
BAX
BCAT2
BCHE
BCL2
BIRC7
BLVRB
BMP7
BST1
C1R
C1S
C8G
CA1
CA12
CA2
CASP3
CASP7
CAT
CBR1
CCL5
CCNA2
CD1A
CDA
CDC42
CDK2
CDK5R1
CDK6
CDK7
CES1
CFB
CFD
CHEK1
CHIT1
CLK1
CMA1
CPB1
CRAT
CSNK1G2
CSNK2A1
CTNNA1
CTSB
CTSD
CTSF
CTSG
CTSK
CTSS
CTSV
CYP2C9
DAPK1
DCK
DDX39B
DDX6
DHFR
DHODH
DPP4
DTYMK
DUSP6
EGFR
EIF4E
ELANE
EPHA2
EPHB4
EPHX2
ERBB4
ESR1
ESR2
ESRRG
F10
F2
F7
FABP3
FABP4
FABP5
FABP6
FAP
FCAR
FDPS
FECH
FGFR2
FHIT
FKBP1A
FNTA
GALE
GALK1
GART
GBA
GC
GCK
GLO1
GM2A
GMPR
GNPDA1
GP1BA
GPI
GSK3B
GSR
GSTA1
GSTP1
GSTT2B
HCK
HDAC8
HEXB
HINT1
HK1
HMGCR
HNF4G
HPN
HPRT1
HSD11B1
HSD17B1
HSP90AA1
HSPA1A
HSPA1B
HSPA8
IGF1
IGF1R
IGLV2-8
IL2
IMPA1
IMPDH1
IMPDH2
ISG20
ITGAL
ITK
JAK3
KDR
KIF11
KIT
KYAT1
LCK
LCN2
LDHB
LGALS2
LGALS3
LGALS7
LGALS7B
LYZ
MAN1B1
MAOB
MAP2K1
MAPK10
MAPK14
MAPK8
MAPKAPK2
MDM2
ME2
MET
MIF
MMP12
MMP13
MMP16
MMP2
MMP3
MMP7
MMP8
MMP9
MTAP
MTHFD1
NCS1
NDST1
NMNAT1
NMNAT3
NOS2
NOS3
NPR3
NQO1
NQO2
NR1H2
NR1H4
NR1I3
NR3C2
OTC
PADI4
PAH
PAK6
PAPSS1
PARP1
PCK1
PDE3B
PDE4B
PDE4D
PDE5A
PDHB
PDK2
PDPK1
PGF
PGR
PIK3CG
PIM1
PKLR
PLA2G10
PLA2G2A
PLAU
PLK1
PNMT
PNP
PNPO
PPARA
PPARG
PPCDC
PPIA
PPP5C
PRKACA
PRKCQ
PTPN1
PTPN11
PYGL
QPCT
RAB11A
RAB5A
RAC2
RBP4
REG1A
REN
RHEB
RHOA
RNASE3
RNASE4
RTN4R
S100A9
SDS
SEC14L2
SELP
SERPINA1
SHBG
SHMT1
SOD2
SORD
SRC
SRM
SSE1
ST14
STAT1
SULT2A1
SULT2B1
SYK
TGFBR1
TGFBR2
TGM3
THRA
THRB
TNK2
TPH1
TPI1
TRAPPC3
TREM1
TTR
TYMP
TYMS
UCK2
WAS
XIAP
YARS1
ZAP70
ATF3
BACH1
BDNF
CASP3
DDIT3
GDNF
HMOX1
MAPK1
MAPK3
NFE2L2
NGF
NTRK1
NTRK2
SNCA
GDNF
TMPRSS11D
ABCC1
ADAM10
ADORA1
ALOX12
ALOX15
AOC3
APEX1
AVPR1B
BLM
C5AR1
CCR1
CCR2
CDK1
CFTR
CHRM5
CHRNB4
CHUK
CLK4
CNR1
CTSD
CYP3A4
DPP7
DPP9
DUSP3
ERAP1
F13A1
FBP1
FFAR4
FPR1
FPR2
GLRA1
GPBAR1
GPR35
GPR6
GRIA2
GRIN1
GRK5
GUSB
HDAC5
HPRT1
HSD17B10
HSP90AA1
KDM1A
KDM4A
KDM5C
KIF11
KLF5
MAOA
METAP2
MIF
MME
NFE2L2
NFKB1
NOS2
NPC1
NR1I2
NR3C2
NR4A1
NT5E
NTRK3
NTSR2
PDE3A
PDE3B
PDGFRB
PIK3R1
PIN1
PLAT
PLAU
PSMB1
PSMB2
PTGER2
PTGS1
QRFPR
RORB
RXFP1
S1PR5
SAE1
SCD
SCN2A
SCN3A
SCN4A
SERPINE1
SLC40A1
SLC6A5
STAT1
TDP1
TFPI
THRA
TLR4
TLR8
TOP2A
TRIM24
TTR

## Sheet: Table S2
Suppplementary Table S2 110 common targets between ECH and EC-related target genes
PGR
PIK3CG
AKT1
EGFR
FGFR2
BCL2
ESR1
ESR2
IGF1R
NFE2L2
AKR1B1
SULT2B1
AKR1C3
PPARG
IGF1
AR
MDM2
MMP2
MMP9
MAPK3
BAX
MAPK1
SHBG
PIK3R1
MET
SRC
PARP1
LCN2
TYMP
GSTP1
HSD17B1
SERPINE1
PLAU
TGFBR2
KIT
CTNNA1
PTPN11
CASP3
FHIT
KDR
CDK2
MMP7
TGFBR1
PLA2G2A
CCNA2
PDGFRB
CDK6
MME
TYMS
TOP2A
MAPK8
CTSD
IL2
CDK1
ANXA5
NFKB1
CYP3A4
NTRK1
NQO1
MMP3
STAT1
SOD2
CHEK1
XIAP
ABCC1
ERBB4
HSP90AA1
TLR4
PLK1
DHFR
RHOA
MAPK14
EPHB4
CCL5
LGALS3
ALB
EPHA2
GSK3B
CTSB
NOS2
CASP7
KLF5
DAPK1
ALDH2
MIF
SERPINA1
EIF4E
PTGS1
ST14
BDNF
NR1H2
MMP13
MTAP
TYR
CDC42
APEX1
BAG1
NGF
NOS3
ALDOA
CHUK
TRIM24
KDM1A
CFTR
NTRK2
DPP4
HPN
MMP12
CDK7
HSPA8
